[illegible]

Infographic created by Jonathan P. Wanderer, M.D., M. Phil., Vanderbilt Preoperative Evaluation Center, Vanderbilt Anesthesiology & Perioperative Informatics Research Division, Department of Anesthesiology, Vanderbilt University School of Medicine. jon.wanderer@vanderbilt.edu. Data provided by the Anesthesia Quality Institute, Richard P. Dutton, M.D., M.B.A., Executive Director.
